# Supplementary material for: Experimental and theoretical study on DNA-binding and photocleavage properties of chiral complexes Δ- and Λ-[Ru(bpy)2L] (L = o-hpip, m-hpip and p-hpip)Electronic supplementary information (ESI) available: electronic spectra and photocleavage diagrams. See http://www.rsc.org/suppdata/dt/b2/b212443b/
Source: Royal Society of Chemistry journal article supplement (doi:10.1039/b212443b), 2003-03-03
Supplement: b212443b.doc [file b212443b.doc]

Supplementary Material **(**B212443B)

**Spectroscopy and photocleavage diagrams for experimental and theoretical study on DNA-Binding and Photocleavage Properties of Chiral Complexes - and -[Ru(bpy)2L](L= *o-*hpip, *m-*hpip and *p-*hpip)**

***Wen J. Mei, Jie Liu, Kang C. Zheng, Li J. Lin, Hui Chao, An X. Li, Feng C. Yun*  *HHand Liang N. Ji****

**1. Submission details**

Publication contact author name: Liang-Nian Ji

Publication contact author address:

School of Chemistry and Chemical Engineering,

Zhongshan University

Guangzhou

GD 510275

PRC

Publication contact author email: cesjln@zsu.edu.cn

Publication contact author fax: +86 20 8403 5497

Publication contact author phone: +86 20 8403 5453

Publication requested category:

Publication requested coeditor name:

**2. Title and author list**

Publication section title:

Experimental and Theoretical Study on DNA-Binding and Photocleavage Properties of Chiral Complexes - and -[Ru(bpy)2L](L= o-hpip, m-hpip and p-hpip)

Publication author name and address

W. -J. Mei

School of Chemistry and Chemical Engineering,

Zhongshan University

Guangzhou,

GD, 510275

PRC

J. Liu

School of Chemistry and Chemical Engineering,

Zhongshan University

Guangzhou,

GD, 510275

PRC

K.-C. Zheng

School of Chemistry and Chemical Engineering,

Zhongshan University

Guangzhou,

GD, 510275

PRC

L.-J. Lin

School of Chemistry and Chemical Engineering,

Zhongshan University

Guangzhou,

GD, 510275

PRC

H. Chao

School of Chemistry and Chemical Engineering,

Zhongshan University

Guangzhou,

GD, 510275

PRC

A.-X. Li

School of Life Sciences,

Guangzhou,

GD, 510275

PRC

F.-C. Yun

School of Chemistry and Chemical Engineering,

Zhongshan University

Guangzhou,

GD, 510275

PRC

L.-N. Ji

School of Chemistry and Chemical Engineering,

Zhongshan University

Guangzhou,

GD, 510275

PRC

**3. Captions for figures:**

**Figure 1.** Electronic spectra of **Δ- 2**, **Λ- 2**, **Δ- 3**, and **Λ- 3** in 5 mM Tris-HCl buffer (pH 7.2), 50 mM NaCl in the presence of increasing amounts of calf thymus DNA (the DNA absorption was subtracted, and the change at IL absorption was not shown). [DNA] = 0 ~3.0 × 10-4 mol•dm-3, [Ru] = 6.0 × 10-6 M. Arrows show the absorbance changes upon increasing amounts of CT-DNA concentration.

**Figure 2.** Emission spectra of **Δ - 2**, **Λ - 2**, **Δ - 3** and **Λ – 3** in 5 mM Tris-HCl buffer (pH 7.2), 50 mM NaCl in the presence of increasing amounts of CT-DNA. [DNA] = 0 ~2.4 × 10-5M; [Ru] = 1.0 × 10-5 M. Arrows show the emission intensity changes upon increasing amounts of CT-DNA concentration.

**Figure 3.** Photocleaveage of pBR322 DNA in 50 mM Tris-HCl buffer (pH 8.3), 18 mM NaCl in the absence (lane 0) and in the presence of Ru(II) complexes **Δ-2** (lane 1 ~ 3), **Λ-2** (lane 4 ~ 6), **Δ-3** (lane1′~ 3′), and **Λ-3** (lane 4′~ 6′).[**Δ-2**] = 25, 50, 100 × 10-6M(lane 1 ~ 3); [**Λ-2**] = 25, 50, 100 × 10-6M(lane 4 ~ 6); [**Δ-3**] = 25, 50, 100 × 10-6M(lane 1′~ 3′); [**Λ-3**] = 25, 50, 100 × 10-6M(lane 4′~ 6′). The control without complex and without light irradiation was shown in lane 0′.

**Figure 4.** Photocleaveage of pBR322 DNA in 50 mM Tris-HCl buffer (pH 8.3), 18 mM NaCl in the presence of Ru(II) complexes **Δ-2** (lane 1 ~ 4), **Λ-2** (lane 5 ~ 8), **Δ-3** (lane1′~ 4′), and **Λ-3** (lane 5′~ 8′). [Ru] = 50 × 10-6M ( t = 15, 30, 45 and 60 min, respectively).


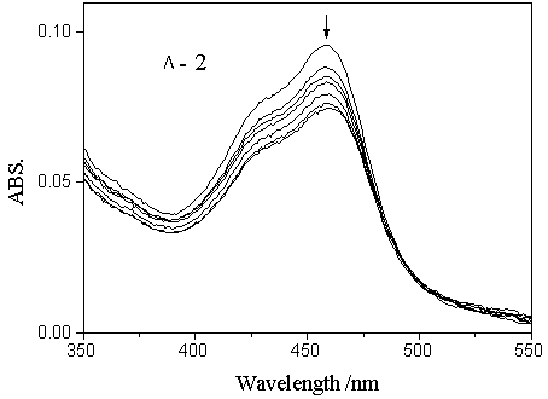


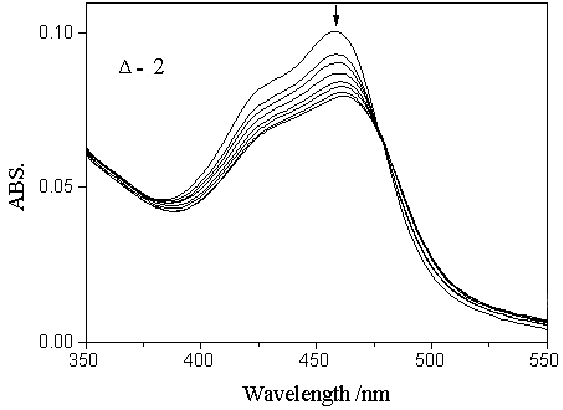


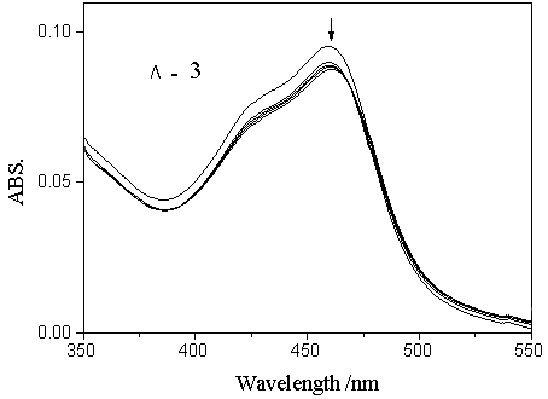

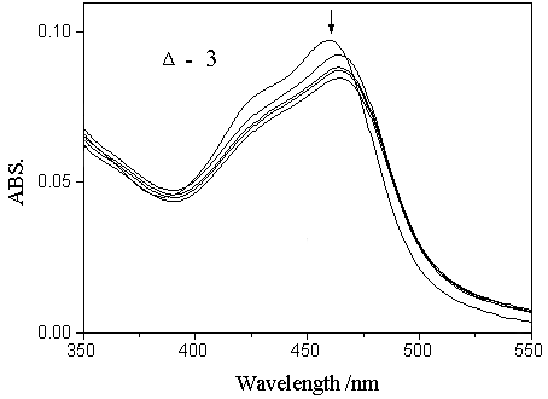


# Fig. 1

**
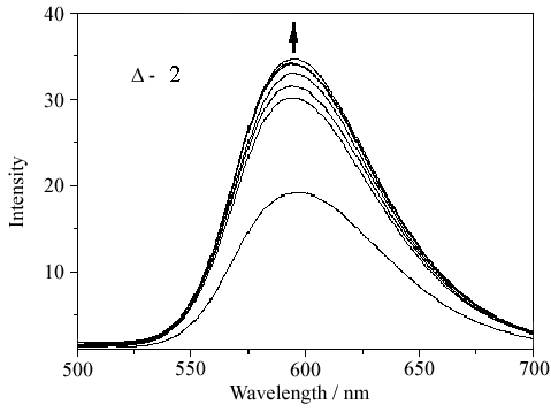

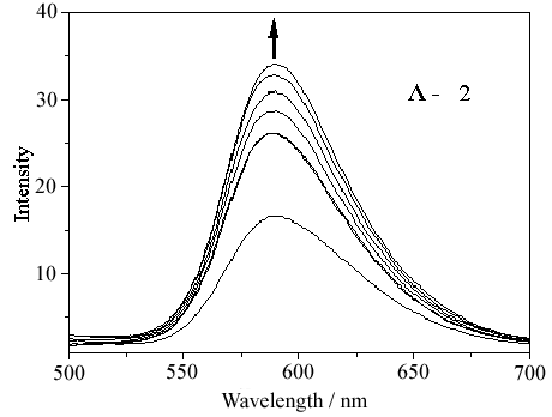
**

**
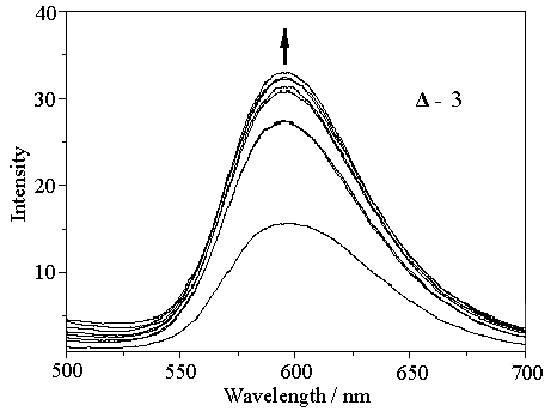

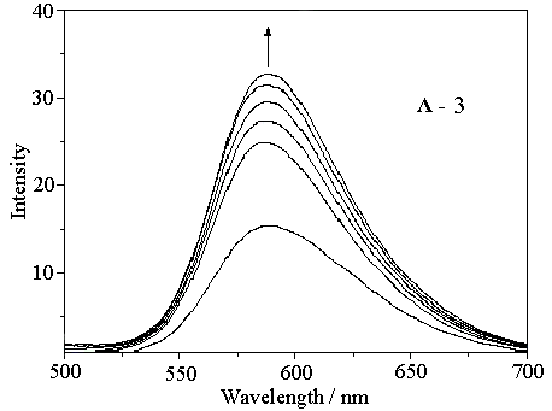
**

# Fig. 2


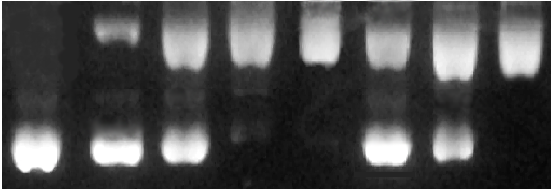
Form II

Form I

0′ 0 1 2 3 4 5 6


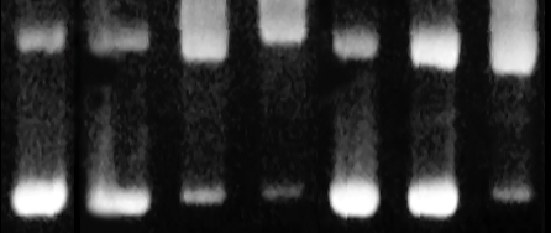
Form II

Form I

0 1′ 2′ 3′ 4′ 5′ 6′

**Fig. 3**


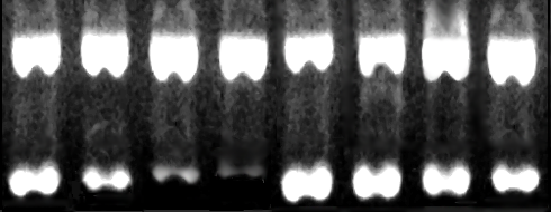
Form II

Form I

1 2 3 4 5 6 7 8


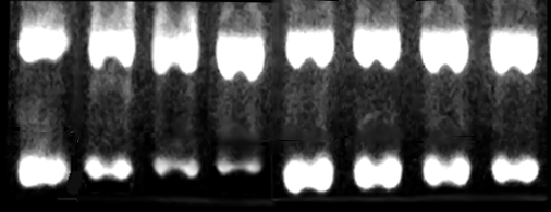
Form II

Form I

1′ 2′ 3′ 4′ 5′ 6′ 7′ 8′

# Fig. 4
